# Supplementary material for: Evolutionary Signatures amongst Disease Genes Permit Novel Methods for Gene Prioritization and Construction of Informative Gene-Based Networks
Source: PLoS Genet. 2015 Feb 13;11(2):e1004967. doi: 10.1371/journal.pgen.1004967 (PMC4334549; doi:10.1371/journal.pgen.1004967)
Supplement: S3 Table — This supplemental table lists examples of disease-disease associations that were concordant and discordant between the evolution-based (ERC) disease map and the disease map produced by Goh et al. (PNAS 2007). Each line lists 2 or more diseases that formed an associated cluster. The first list contains disease associations found in both maps. The second contains associations found in our evolution-based map that were not observed in the map by Goh et al. (PDF) [file pgen.1004967.s004.pdf]

**Table S3** – Comparison of evolutionary and non-evolutionary disease maps

|                                                                                   |
|-----------------------------------------------------------------------------------|
| <b>Disease associations shared between Evolutionary and Goh <i>et al.</i> map</b> |
| Thalassemia, Heinz body anemia                                                    |
| Thrombophilia, Dysfibrinogenemia                                                  |
| Complement deficiency, Immunodeficiency                                           |
| Holoprosencephaly, Nightblindness (“Ophthalmological cluster”)                    |
| Blood group, Spherocytosis, Elliptocytosis, Malaria                               |
| Ichthyosis, Arrhythmogenic right ventricular dysplasia                            |
|                                                                                   |
| <b>Evolutionary disease associations not found in Goh <i>et al.</i> map</b>       |
| Hirschsprung disease, Melanoma                                                    |
| Bethlem myopathy, Surfactant metabolism dysfunction                               |
| Mental retardation, Myopathy                                                      |
| Achromatopsia, Paraganglioma                                                      |
| Leigh syndrome, various mitochondrial diseases                                    |
| Iminoglycinuria, Hyperglycinuria, Pseudoaldosteronism, Bronchiectasis             |
